# Supplementary material for: Ab Initio Modelling of the Structure of ToxA-like and MAX Fungal Effector Proteins
Source: MDPI journal article supplement (doi:10.3390/ijms24076262), 2023-03-26

# ***Ab initio* modelling of the structure of ToxA-like and MAX fungal effector proteins**

**Lina Rozano, Yvonne M. Mukuka, James K. Hane and Ricardo L. Mancera**

## **Supplementary Materials**

**Table S1.** Uniprot ID of templates used for ToxA and MAX effectors.

| Template PDB ID | Uniprot ID                       | Reference                                  |
|-----------------|----------------------------------|--------------------------------------------|
| Tox A           |                                  |                                            |
| 1ZLD            | P78737 (P78737_9PLEO)            | Sarma, Manning, Ciuffetti, & Karplus, 2005 |
| 5OD4            | A0A0C4DI32 (A0A0C4DI32_FUSO4)    | Di et al., 2017                            |
| 2QVT            | Q1HBK6 (Q1HBK6_MELLI)            | Wang et al., 2007                          |
| MAX             |                                  |                                            |
| 2MM0            | Q9C173 (Q9C173_9PLEO)            | Nyarko et al., 2014                        |
| 5Z1V            | A0A0H4ITX1<br>(A0A0H4ITX1_MAGOR) | Zhang et al., 2018                         |
| 6FUB            | C4B8C2 (C4B8C2_MAGOR)            | De la Concepcion et al., 2018              |
| 5ZNG            | FTJ0N2 (RGA5R_ORYSJ)             | Guo et al., 2018                           |
| 2N37            | B9WZW9 (B9WZW9_MAGOR)            | Ose et al., 2015                           |
| 2LW6            | H2DQR0 (H2DQR0_MAGOR)            | Zhang et al., 2013                         |

**Table S2.** FASTA sequences of ToxA and MAX effector templates used in Rosetta *ab initio* modelling.

| Effector (PDB ID) | FASTA sequence |
|-------------------|----------------|
|-------------------|----------------|

|                            |                                                                                                                                                                                                       |
|----------------------------|-------------------------------------------------------------------------------------------------------------------------------------------------------------------------------------------------------|
| ToxA (1ZLD)                | >ToxA (PDB ID: 1ZLD)<br>APTPEADPGYEIVKLFEAANSSELDARGLSLDWTLKPRGLLQERQGSC<br>MSITINPSRPSVNNIGQVDIDSVILGRPGAIGSWELNNFITIGLNRVNAD<br>TVRVNIRNTGRNRLIITQWDNTVTRGDVYELFGDYALIQGRGSFCLN<br>IRSDTGRENWRMQLEN |
| Avr2 ( <i>Fol</i> ) (5OD4) | >Avr2 (PDB ID: 5OD4)<br>MSMTWVCSIAGLPVEDADSSVGQLQGRGNPYCVFPGRRTSSTSFTTSF<br>STEPLGYARMLHRDPPYERAGNSGLNHRİYERSRVGGLRTVIDVAPPD<br>GHQAIANYEIEVRRIPVATPNAAGDCFHTARLSTGSRGPATISWDADA<br>SYTTYLTISED       |
| AvrL567 (2QVT)             | >AvrL567 (PDB ID: 2QVT)<br>MEDVPAELTGVSEGYTRFYRSPTASVTL SGLVNVKWDNEQMTMPLF<br>KWIGGEQAEELHFCVHIAHSIGPKLNLARTLGTVNSNMDDQHWAAH<br>RHSGATRRTIQDFHLFANDIPNFPDYIKIKLVPKT                                   |
| ToxB (2MM0)                | >ToxB (PDB ID: 2MM0)<br>NCVANILNINEAVIATGCVPAAGGELRIFVGSSHSYLIKATSSCGLSLTN<br>QVFINGESVQSGGR                                                                                                          |
| AvrPib (5Z1V)              | >AvrPib (PDB ID: 5Z1V)<br>TQVTILKKGERITWVEVPKGESREFNIRGKYFTVSVSDDGTSPISGSKY<br>TVE                                                                                                                    |
| AvrPik (6FUB)              | >AvrPik (PDB ID: 6FUB)<br>ETGNKYIEKRAIDLSRERDPNFFDNPGIPVECFWFMFKNNVRQDAGT<br>CYSSWKMDMKVGPVWVHIKSDDNCNLSGDFPPGWIVLGKKRPGF                                                                             |
| Avr1CO3 9 (5ZNG)           | >Avr1CO39 (PDB ID: 5ZNG)<br>WKDCIIQRYKDGDVNNIYTANRNEEITIEEYKVFVNEACHPYPVILPD<br>RSVLSGDFTSAYADDDDESC                                                                                                  |
| AvrPia (2N37)              | >AvrPia (PDB ID: 2N37)<br>APARFCVYYDGHLPATRVLLMYVRIGTTATITARGHEFEVEAKDQNC<br>KVILTNGKQAPDWLAAEPY                                                                                                      |
| AvrPiz-t (2LW6)            | >AvrPiz-t (PDB ID: 2LW6)<br>SFVQCNHLLYNGRHWGTIRKKAGWAVRFYEEKPGQPKRLVAICKN<br>ASPVHCNYLKCTNLAAGFSAGTSTDVLSSGTVGSIGNDPQAQRQ                                                                             |

**Table S3.** UniProt and GenBank identifiers of structurally-unconfirmed effectors used in Rosetta *ab initio* modelling.

| Effector | Gene name                 | UniProt ID                       | GenBank ID | Fungal              |
|----------|---------------------------|----------------------------------|------------|---------------------|
| Avr2     | Avr2                      | A0A0A7HTX0<br>(A0A0A7HTX0_PASFU) | AIZ11403.1 | <i>Fulvia fulva</i> |
| AVR4E    | AVR4E protein             | Q5VB04 (Q5VB04_PASFU)            | AAT28197.1 | <i>Fulvia fulva</i> |
| Avr5     | AVR5                      | A0A023UJQ9<br>(A0A023UJQ9_PASFU) | AHY02126.1 | <i>Fulvia fulva</i> |
| AVR9     | Race-specific elicitor A9 | P22287 (AVR9_PASFU)              | P22287.1   | <i>Fulvia fulva</i> |

|         |                                              |                               |                |                                        |
|---------|----------------------------------------------|-------------------------------|----------------|----------------------------------------|
| AVRA1   | CSEP0008 putative effector protein           | N1JGD1 (N1JGD1_BLUG1)         | CCU81904.1     | <i>Blumeria graminis f. sp. hordei</i> |
| AvrL2-A | AvrL2-A                                      | A0A1B2CW13 (A0A1B2CW13_MELLI) | ANY58853.1     | <i>Melampsora lini</i>                 |
| avrLm1  | avrLm1 protein                               | Q258K5 (Q258K5_LEPMC)         | CAJ29326.1     | <i>Leptosphaeria maculans</i>          |
| AvrLm11 | AvrLm11 protein                              | E4ZT77 (E4ZT77_LEPMJ)         | XP_003838051.1 | <i>Leptosphaeria maculans</i>          |
| AvrLm6  | AvrLm6 protein                               | A4F4L2 (A4F4L2_LEPMC)         | CAJ90695.1     | <i>Leptosphaeria maculans</i>          |
| AvrPi9  | Zn2-C6 fungal-type domain containing protein | G4NJP7 (G4NJP7_MAGO7)         | XP_003721206.1 | <i>Magnaporthe oryzae</i>              |
| AVR-Pii | AVR-Pii protein                              | C4B8B7 (C4B8B7_MAGOR)         | ELQ63308.1     | <i>Magnaporthe oryzae</i>              |
| AvrStb6 | AvrStb6                                      | A0A2K9YVY7 (A0A2K9YVY7_ZYMTR) | AUW40142.1     | <i>Zymoseptoria tritici</i>            |
| BAS1    | Biotrophy-associated secreted protein 1      | G5EHI7 (BAS1_MAGO7)           | XP_003710761.1 | <i>Magnaporthe oryzae</i>              |
| BAS162  | MGG_09379                                    | G4NI07 (G4NI07_MAGO7)         | XP_003720234.1 | <i>Magnaporthe oryzae</i>              |
| BAS2    | Biotrophy-associated secreted protein 2      | G5EI08 (BAS2_MAGO7)           | XP_003717663.1 | <i>Magnaporthe oryzae</i>              |
| BAS4    | Biotrophy-associated secreted protein 4      | G5EI20 (BAS4_MAGO7)           | XP_003717679.1 | <i>Magnaporthe oryzae</i>              |
| CgEP1   | Host-nuclear effector                        | E3QDG3 (E3QDG3_COLGM)         | XP_008092955.1 | <i>Colletotrichum graminicola</i>      |
| ECP1    | ECP1                                         | Q00364 (Q00364_PASFU)         | QDX18247.1     | <i>Fulvia fulva</i>                    |
| ECP2    | ECP2 protein                                 | Q00365 (Q00365_PASFU)         | QDX18258.1     | <i>Fulvia fulva</i>                    |
| ECP4    | ECP4 protein                                 | Q9P408 (Q9P408_PASFU)         | ABM47072.1     | <i>Fulvia fulva</i>                    |
| ECP5    | ECP5                                         | Q9P407 (Q9P407_PASFU)         | ABM47073.1     | <i>Fulvia fulva</i>                    |
| eff1-1  | Effector family protein Eff1-1               | Q4PDL7 (Q4PDL7_USTMA)         | XP_011387751.1 | <i>Ustilago maydis</i>                 |
| Iug6    | Mo_GLEAN_10000617                            | A0A0A7DLN4 (A0A0A7DLN4_MAGOR) | AIP86908.1     | <i>Magnaporthe oryzae</i>              |

|          |                                      |                               |                |                                 |
|----------|--------------------------------------|-------------------------------|----------------|---------------------------------|
| MiSSP7   | MISSP7.2                             | B0DD66 (B0DD66_LACBS)         | XP_001881946.1 | <i>Laccaria bicolor</i>         |
| MoCDI P4 | CBM1 domain-containing protein       | A0A4P7NBE8 (A0A4P7NBE8_MAGOR) | QBZ57550.1     | <i>Magnaporthe oryzae</i>       |
| MoHE G13 | MGG_09378                            | G4NI08 (G4NI08_MAGO7)         | XP_003720235.1 | <i>Magnaporthe oryzae</i>       |
| NIP2     | NIP2 avirulence protein              | U3NHN5 (U3NHN5_9HELO)         | AGW29229.1     | <i>Rhynchosporium commune</i>   |
| NIP3     | NIP3 avirulence protein              | I1VGT8 (I1VGT8_9HELO)         | AFI43936.1     | <i>Rhynchosporium commune</i>   |
| pep1     | UMAG_01987                           | A0A0D1E411 (A0A0D1E411_USTMA) | XP_011387901.1 | <i>Ustilago maydis</i>          |
| Pit2     | Secreted effector Pit2               | A0A0D1EAR7 (PIT2_USTMA)       | XP_011387264.1 | <i>Ustilago maydis</i>          |
| PpEC23   | CSEP-35                              | A0A142KWI6 (A0A142KWI6_PHAPC) | AMS24306.1     | <i>Phakospora pachyrhizi</i>    |
| PstPEC 6 | Kazal-like domain containing protein | A0A2S4WEB9 (A0A2S4WEB9_9BASI) | POW20114.1     | <i>Puccinia striiformis</i>     |
| PstSCR 1 | PSTT_01941                           | A0A2S4W1V6 (A0A2S4W1V6_9BASI) | POW15657.1     | <i>Puccinia striiformis</i>     |
| RTP1     | Rust transferred protein             | Q334H6 (Q334H6_UROFA)         | CAI96535.1     | <i>Uromyces fabae</i>           |
| SPD10    | MGG_11991                            | G4MPQ6 (G4MPQ6_MAGO7)         | XP_003709017.1 | <i>Magnaporthe oryzae</i>       |
| SPD2     | MGG_12942                            | G4N480 (G4N480_MAGO7)         | XP_003712607.1 | <i>Magnaporthe oryzae</i>       |
| SPD4     | MGG_14422                            | A4UBM2 (A4UBM2_MAGO7)         | XP_003711101.1 | <i>Magnaporthe oryzae</i>       |
| SsSSVP 1 | CVNH domain-containing protein       | A7E9T8 (A7E9T8_SCLS1)         | XP_001597872.1 | <i>Sclerotinia sclerotiorum</i> |

**Table S4.** FASTA sequences of structurally-unconfirmed effectors used in Rosetta *ab initio* modelling.

| Effector                 | FASTA sequence                                                                                                          |
|--------------------------|-------------------------------------------------------------------------------------------------------------------------|
| Avr2 ( <i>F. fulva</i> ) | >Avr2<br>KKLPGCDKDPCKVKEKSGKYKLKIGAKCSATCDGKLTRGGTCENVQGN<br>HLCCFGLCG                                                  |
| AVR4E                    | >AVR4E<br>DFSRDCCPPGSGVGNQAEWSARGVDGTAIPRELDHSLCDCFKPFLNVLG<br>CSVTSVVTERAVFVKGHLNYCARMSESVAGISPCKEWEIEVGGAHPERM<br>ANR |
| Avr5                     | >Avr5                                                                                                                   |

|         |                                                                                                                                                                                                               |
|---------|---------------------------------------------------------------------------------------------------------------------------------------------------------------------------------------------------------------|
|         | SYDALPINCRDTTNYCFNGNGRHEVCSYCNQAKEEPLKLGRGGQQRDCG<br>VAGSQCNDVDHQQCDARCCSKIGSPTFYGVRCPPY                                                                                                                      |
| AVR9    | >AVR9<br>AALPVGLGVGLDYCNSSCTRAFDCLGQCGRCDFHKLQCVH                                                                                                                                                             |
| AVRA1   | >AVRa1<br>RTWQCPSGDILYEEDVYSHTNMNSFEHFPFKTIEDEVYENTSLSRGVVYK<br>VLDVHPSSSSATTFAVFTSNKRVAVVYQQGYRNNRKFIIECT                                                                                                    |
| AvrL2-A | >AVR2a<br>KKLPGCDKDPCKVKEKSGKYKLKIGAKCSATCDGKLTRGGTCENVQGN<br>HLCCFGLCG                                                                                                                                       |
| avrLm1  | >avrLm1<br>SPATKNNVNQPLDNISRRSEWKSQISPVKEHSAKTADNTENNHNLEKR<br>VFTSPHMKRTFTLALENTFYAMAWLIDFSFSDDGEPHFSYKLQSFNHEDN<br>PPKILADVVPPLITTSYNSANQYRGKANVELLCHLAKEYVHVYFSVEVFA<br>SGASFVIGKIIDYPTVYVNNQFRKVVKFDIAGAI |
| AvrLm11 | >AvrLm11<br>FEGRPCCQKWIEQCKLEGAVGCMLADYNYCVVPSSTCQEQCNGFFGRN<br>GRSTHGRDTEYVYQIHNMYTANEKDPTC                                                                                                                  |
| AvrLm6  | >AvrLm6<br>QPHLLCACESGRRDGVDDTRTLKVVKGTGGRFVFSSRYWTKAEGAPHE<br>GNYAHAINGTITKKGTNIQAHDDGLIGGEEMNSLCPEHSTCFSPNLKAKS<br>THSCGPDGKYGCVSAWLSVNWEGQIQ                                                               |
| AvrPi9  | >AvrPi9<br>LPAGGLPGSPGSAVQQRCHCPPRGSHAHGSLAAREEAPEAEGDAKISARYT<br>CPNCHKTKGKCDDGWCQVEKTHW                                                                                                                     |
| AVR-Pii | >AVR-Pii<br>LPTPASLNGNTEVATISDVKLEARSDTTYHKCSKCGYGSDDSDAYFNHK<br>CN                                                                                                                                           |
| AvrStb6 | >AvrStb6<br>RVSCGGIGDLCKAGDSCCNYPGTDCFQDGQYPRCHTACGHFQFGFCHDG<br>KQCNCQVILGCGCV                                                                                                                               |
| BAS1    | >BAS1<br>ADQGSNTFDQRYQGYPWRPANGPIREEKQENVGHRRGGAEYFTSGSPSI<br>AAEDYSAKNAPSRFEQWKAQQKERAERKQDRGLNGIRRVENYYF                                                                                                    |
| BAS162  | >BAS162<br>GGGTYPKDPALAHRAPEKFPWSGLLNNPFMTKPVIWYQIGQIKIWDTR<br>DVTYVRDGTKFDTYDQCLSHCLKYSVFNKSKARSSGSQGQTSEYRGRR<br>MHH                                                                                        |
| BAS2    | >BAS2<br>NVTPNDAKAKNVGTGNGQQFITGGCVNGTDCQSRCCAGNGENKGVCSN<br>EVAANQNGKTGCGFEDPNKAQTVKEAKEQVKKQGF                                                                                                              |
| BAS4    | >BAS4<br>DSHQNLVCVRTYPDNNSAENLEATRCACDWLKKNGKCDDCTIWENRLC<br>HSDAKSLDGNEFEDACVRKCPNLGATGSSIPPA                                                                                                                |
| CgEP1   | >CgEP1                                                                                                                                                                                                        |

|         |                                                                                                                                                                                                                                                                                                                                                                                                                                                                   |
|---------|-------------------------------------------------------------------------------------------------------------------------------------------------------------------------------------------------------------------------------------------------------------------------------------------------------------------------------------------------------------------------------------------------------------------------------------------------------------------|
|         | APTAPINDVAAPVEARAADFVDGAHLEARNKNNKKKKKEGKKDKKAKDN<br>ARDLTELED RDADDVTIVEIRTPEFVADDAHNLEARNKNNKKKKKKGGKK<br>DKKEKKAKDNARDLTELEARDEEADDAQALEARNNKNNKKKKKKGGKKDKK<br>EKKAKNNARDLTELEARDEEAEDAAQALEARNNKNNKKKKKKGGKKDKKEKK<br>AKNNARDLTELEARDEEADDAQALEARNNKNNKKKKKKGGKKDKKEKKAKN<br>NARDLTELEARDEEADDAQALEARNNKNNKKKKKKGGKKDKKEKKAKNNAR<br>DLTELEARDEEAEDAAQALEARNNKNNKKKKKKGGKKDKKEKKAKDAGAA                                                                       |
| ECP1    | >ECP1<br>TVQGGAPVDDLKFAKKFNQNCQQISGGPNGAICPDGDLYWCKDGRAIFC<br>QTCQTGCTADENGKVGVCNEGPTNPKCL                                                                                                                                                                                                                                                                                                                                                                        |
| ECP2    | >ECP2<br>RNAGNSPGSNRCDASTFNNGQDFDIPQAPVNDCRQMVENINRDSQFSVS<br>HSWARPFGGYGDCAFNVRVIAGWRNGLVGGADAVDLLTDSVKNFGEA<br>NKVSSKGTYNQIVSAEGETCDSVDRGGQVRVQWIVASSYNPSNDD                                                                                                                                                                                                                                                                                                    |
| ECP4    | >ECP4<br>DPSFRFSEYGNGDTTCSPDNLISPSVSIDDGFGGCKQFPANTNSVQYALLE<br>GSRAGCIVKLFTNNACNESADSEHVPVAVGETKCQPPIGGGWQSVQVTCF                                                                                                                                                                                                                                                                                                                                                |
| ECP5    | >ECP5<br>RGDNKPGQFNYICEDIPCDEEGVDSWILQACIGIGGTELTAHGGIYDTTGE<br>LVGRTAICLCARGQTKAHDYNISGDYPPGVAHLTFDVRAPYWCQSSG                                                                                                                                                                                                                                                                                                                                                   |
| eff1-1  | >eff1-1<br>WPYPGSGNHPDNADGARRGEQSPLPGFSVAHPSSPQNEFDPDLLRSLLAKI<br>ESEASSHPHVAFQGDGHYYPNVNQPSLYQASQHGFGSLSRDKGQVGSS<br>QAREFSFTQGLSSSAEPAFKYRKTVQRVADALRQFQANNRLEGAQALR<br>DIIQRHPQLDTTSGSQSGFRNNFGAAPSVPRESQGGTIHHGPGDTKV<br>DIPSDRIEAQTAEESHESQPLAGHGDGRYRSLPASRADELRKIPTTMLAL<br>PPPSRTRYIYDQVDDPAIRDNINNQVFAGKLVWIDRARIPASRIVSSRKQM<br>FRPHRVLPMTNFPFIHLSDGKGSIKDVRFTFHGGGSYRLMSWPEGYNLVE<br>GQNYLAFWGIPEGRQTGRPMLMQNYGYAFLPPQHRLEVNEHLWALKKE<br>IADKASEATWMHA |
| Iug6    | >Iug6<br>NTVAPADVAAVDAPRAPLLVRRNCEGKNTQAECERFKWLTGCTWLRGS<br>KYCSST                                                                                                                                                                                                                                                                                                                                                                                               |
| MiSSP7  | >MiSSP7<br>SPVPGEVGLVERGPIPNVAFRRVPEPNFFKDLLRALGQASQGGDLHR                                                                                                                                                                                                                                                                                                                                                                                                        |
| MoCDIP4 | >MoCDIP4<br>HYIFSIVFVNGVQKGGDYTYIRKNSNTYMPSTNDIVNSPDLRCNTGARA<br>NSGTQTLTVKAGDKIGFKLWYNEFIEHPGPGFVYMSKAPGSVASYDGS<br>DWFKAYETGLCGGQPNSDGAWCTWQKDRIEFTIPRTPPGEYLVRVEHL<br>AIHESHVGKGFYMECAQFKVEGPGGGSPGPLVKIPGLYKASDPGIAYN<br>KWTNNPARYVMPGPAVWADNGSSNPSNPPSNPPSNGGGGGGGSGSGAP<br>LYGQCGGEGWTGPKTCAQGTCKVSNQYYSQCL                                                                                                                                                 |
| MoHEG13 | >MoHEG13<br>HPLDNGGLEPRQQKICSPNGHTDGDLTNPNSLCTLCNSGCQRVAGQPAC<br>CS                                                                                                                                                                                                                                                                                                                                                                                               |

|         |                                                                                                                                                                                                                                                                                                                  |
|---------|------------------------------------------------------------------------------------------------------------------------------------------------------------------------------------------------------------------------------------------------------------------------------------------------------------------|
| NIP2    | >NIP2<br>YYVVVVCVPRDGAEIGDVEWAIQNRRLDLALGGKGFWRGHSTSCHRAN<br>AVVDVVALCRSDPYIGAHPTVLKYGASVLCQASGAPDWPTCTVNC                                                                                                                                                                                                       |
| NIP3    | >NIP3<br>ACGDVYTIKGNCTIRDYKCKYPRVPSCNSKGACPYLHLFDVPIFCDQDKD<br>CVTSYKCNKNYKRSPLNLGPFYEDGDLVAKEEGEGGEGDSELVEEDDE                                                                                                                                                                                                  |
| pep1    | >pep1<br>DAAGAVPLPNFKVDPQPLASTFYWFSSVEVGVCYNPQARVGSIKGALHC<br>THQENYDRDNNSYTLPQTCVALKPLGKAFSSNVRDSCRNAKGIFNVIVPA<br>SSNALGSQAYDAVQAKGGTGGTGTDDDTAPDSNDQEKKGGLGGIG<br>SMFGM                                                                                                                                       |
| Pit2    | >Pit2<br>IPVRRSLSTDASMSSAAGKLNRRWWFGFTGSLGKEPDNGQVQIKIIPDALI<br>IKNPPANKDDLNLKLIENLKRKHPRFKTVVMPTDPNGDVVIWE                                                                                                                                                                                                      |
| PpEC23  | >PpEC23<br>ASTSEPSGQTLDCSHYTGANTKEATCNEFPGRICHGGCTGAVVASNCTLN<br>PGEEPQDQTYTIAFGKSSATISICRNEKGSYSCTGPIKGSASCSVCVDPPTG<br>SDQSPTTPAPAPGNNGSTSKEGQTLQCTHFTGANTQSATCNEVPGRVCN<br>KGCTSSVVATKCTLNPGDQESQQNCTQAFGKSSAAISICINDKGSFSCTGS<br>VSGNATCSGCTDQSSSGSSEYPGSSGTTKPPTDPTGGENKDQDKKAEATS<br>LQFAMSSFCLALSLMIGVAVL |
| PstPEC6 | >PSTPec6<br>SGASTPKKCKKTIMHEKDKCWTIGCTEEVSTAKWRLQCDDKNCAHPVC<br>SGDWTPTKAICFVCLGNR                                                                                                                                                                                                                               |
| PstSCR1 | >PstSCR1<br>FKCPGLHGTPSQTHGYCTRSTIDEERKAKKIGKEFTMWKEEIKTVDGKFS<br>CDKVDLNGSVATDSFCCDVAGRIGEVKSKQAMWTNNCSKAS                                                                                                                                                                                                      |
| RTP1    | >RTP1<br>QLVGSDEVVLVRTSHQSMGKASVSYCREMTRQHHKRELDQDANPGHRR<br>HKSEPEGVKPSNHTSAPTPSSPLTTVDLTPAKLNTACYPGTFQAPLLEDC<br>EVVIRAQLYNSTGSLQVSPGDYVVFVSYGTCATVFQNPQYSKYSLQYNWA<br>ELGYVGGKLAGRCLLPEDHSMGGTAVFDTYLGRTYPDVVISLQRFDDR<br>FIPE                                                                                |
| SPD10   | >SPD10<br>QCFDDLDCLFSGIENAKCAKATNTDLLGYETPPPCLLFTPKILGISADLFH<br>NQSASRTCKGPA                                                                                                                                                                                                                                    |
| SPD2    | >SPD2<br>QSCRQLSADFCQCGTYCYRTRDGGCNPAGTFYGLCPLKRETTFEA                                                                                                                                                                                                                                                           |
| SPD4    | >SPD4<br>LYTHHLTVDSHCPSLRSAVASRPGRQEVLEHNPCRKSDALVVITKNDES<br>VPP                                                                                                                                                                                                                                                |
| SsSSVP1 | >SsSSVP1<br>APLEPRQSIWGKPTDVSVQYCYNDFPCINAREAWQSCQVSSLPGSYSQIT<br>DPEARNTVVAQCLCDNKIVNETASCISCLSYASGNFLVLDTVEQHAQDM<br>CDKKTTLQSQYENYVYQFGGLLQFPLILPSTWLSGTKVNLDPQILIKD                                                                                                                                          |

**Table S5.** Secondary structure characteristics of effector templates according to DSSP and STRIDE.

| Effector PDB | DSSP                                                                           | STRIDE                                                                         |
|--------------|--------------------------------------------------------------------------------|--------------------------------------------------------------------------------|
| 1ZDL         | 3% helical (1 helices; 4 residues)<br>49% beta sheet (8 strands; 58 residues)  | 5% helical (1 helices; 6 residues)<br>54% beta sheet (8 strands; 64 residues)  |
| 5OD4         | 2% helical (1 helices; 3 residues)<br>41% beta sheet (8 strands; 53 residues)  | 43% beta sheet (10 strands; 56 residues)                                       |
| 2QVT         | 2% helical (1 helices; 3 residues)<br>28% beta sheet (10 strands; 42 residues) | 2% helical (1 helices; 3 residues)<br>30% beta sheet (10 strands; 45 residues) |
| 2MM0         | 50% beta sheet (6 strands; 32 residues)                                        | 59% beta sheet (6 strands; 38 residues)                                        |
| 5Z1V(A)      | 53% beta sheet (6 strands; 34 residues)                                        | 54% beta sheet (8 strands; 35 residues)                                        |
| 5Z1V(D)      | 53% beta sheet (6 strands; 34 residues)                                        | 50% beta sheet (6 strands; 32 residues)                                        |
| 2LW6         | 47% beta sheet (8 strands; 38 residues)                                        | 57% beta sheet (8 strands; 46 residues)                                        |
| 2N37         | 36% beta sheet (5 strands; 24 residues)                                        | 48% beta sheet (7 strands; 32 residues)                                        |
| 5ZNG         | 44% beta sheet (7 strands; 34 residues)                                        | 44% beta sheet (7 strands; 34 residues)                                        |
| 6FUB         | 3% helical (1 helices; 3 residues)<br>40% beta sheet (6 strands; 38 residues)  | 3% helical (1 helices; 3 residues)<br>41% beta sheet (6 strands; 39 residues)  |

**Table S6.** Structural quality indicators for the best models of ToxA-like, MAX and structurally-unconfirmed effector proteins based on Verify3D, PROCHECK, Ramachandran statistics and PROSA analysis.

| Effectors (species)                                             | Verify3D (% residues with 3D-1D score > 0.2) | PROCHECK (error, warning, pass) | Ramachandran statistics (% residues in favourable, allowed and disallowed regions) | PROSA Z-score |
|-----------------------------------------------------------------|----------------------------------------------|---------------------------------|------------------------------------------------------------------------------------|---------------|
| <i>Effector templates</i>                                       |                                              |                                 |                                                                                    |               |
| ToxA<br>( <i>Pyrenophora tritici-repentis</i> )                 | 61.73                                        | 0, 3, 5                         | 85.5, 14.5, 0                                                                      | -3.70         |
| Avr2<br>( <i>Fusarium oxysporum</i> f. sp. <i>lycopersici</i> ) | 61.29                                        | 0, 2, 6                         | 86.7, 13.3, 0                                                                      | -3.53         |
| AvrL567<br>( <i>Melampsora lini</i> )                           | 77.17                                        | 2, 1, 5                         | 84.5, 14.5, 0.9                                                                    | -4.32         |



|                                                                  |        |         |               |       |
|------------------------------------------------------------------|--------|---------|---------------|-------|
| ToxB<br>( <i>Pyrenophora tritici-repentis</i> )                  | 43.75  | 2, 0, 6 | 79.2, 20.2, 0 | -4.01 |
| AvrPib<br>( <i>Magnaporthe oryzae</i> )                          | 100.00 | 0, 0, 8 | 93.0, 7.0, 0  | -5.68 |
| AvrPik<br>( <i>Magnaporthe oryzae</i> )                          | 87.10  | 0, 3, 5 | 81.3, 18.7, 0 | -3.53 |
| AvrICO39<br>( <i>Magnaporthe oryzae</i> )                        | 31.34  | 2, 1, 5 | 76.7, 23.3, 0 | -3.28 |
| AvrPia<br>( <i>Magnaporthe oryzae</i> )                          | 57.58  | 0, 4, 4 | 80.4, 19.6, 0 | -4.34 |
| AvrPiz-t<br>( <i>Magnaporthe oryzae</i> )                        | 45.56  | 0, 1, 7 | 86.7, 13.3, 0 | -3.93 |
| <i>Structurally-unconfirmed effectors</i>                        |        |         |               |       |
| Avr2<br>( <i>Fulvia fulva</i> )                                  | 100.00 | 0, 2, 6 | 82.2, 17.8, 0 | -5.32 |
| AvrStb6<br>( <i>Zymoseptoria tritici</i> )                       | 100.00 | 1, 1, 6 | 85.4, 14.6, 0 | -4.73 |
| BAS2<br>( <i>Magnaporthe oryzae</i> )                            | 100.00 | 0, 1, 7 | 84.6, 15.4, 0 | -4.4  |
| MiSSP7<br>( <i>Laccaria bicolor</i> )                            | 0.00   | 0, 2, 6 | 90.9, 9.1, 0  | -2.8  |
| BAS4<br>( <i>Magnaporthe oryzae</i> )                            | 100.00 | 0, 2, 6 | 90.1, 9.9, 0  | -3.75 |
| PstSCR1<br>( <i>Puccinia striiformis</i> f. sp. <i>tritici</i> ) | 63.04  | 0, 1, 7 | 86.2, 13.8, 0 | -1.13 |
| Ecp1<br>( <i>Fulvia fulva</i> )                                  | 98.70  | 0, 1, 7 | 86.4, 13.6, 0 | -4.67 |
| AVRA1<br>( <i>Blumeria graminis</i> f. sp. <i>hordei</i> )       | 58.70  | 1, 1, 6 | 89.3, 10.7, 0 | -4.85 |
| Iug6<br>( <i>Magnaporthe oryzae</i> )                            | 100.00 | 0, 1, 7 | 93.5, 6.5, 0  | -5.82 |
| PstPEC6<br>( <i>Puccinia striiformis</i> f. sp. <i>tritici</i> ) | 69.70  | 0, 1, 7 | 87.7, 12.3, 0 | -5.41 |

**Figure S1.** *Ab initio* models ( $nstruct = 50,000$ ) with the lowest RMSD value for each template and their respective native structure using PyMOL Open Source (Schrödinger, LLC) (super function). The Rosetta model is shown in blue and the reference (native) structure in pink.

| Effector name/<br>PDB ID | Rosetta model | Native structure | RMSD<br>(Å) |
|--------------------------|---------------|------------------|-------------|
|--------------------------|---------------|------------------|-------------|

|                                                    |                                                                                     |                                                                                      |               |
|----------------------------------------------------|-------------------------------------------------------------------------------------|--------------------------------------------------------------------------------------|---------------|
| <p>ToxA (1ZLD)<br/>S_00027133</p>                  | 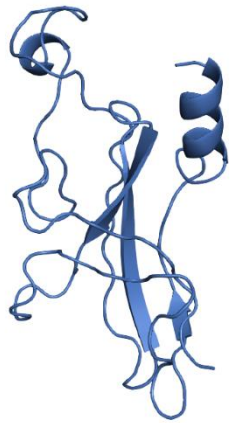   |    | <p>9.642</p>  |
| <p>Avr2 (<i>Fol</i>)<br/>(5OD4)<br/>S_00022933</p> |   |   | <p>14.925</p> |
| <p>AvrL567<br/>(2QVT)<br/>S_00028258</p>           |  |  | <p>0.482</p>  |

|                                     |                                                                                     |                                                                                      |              |
|-------------------------------------|-------------------------------------------------------------------------------------|--------------------------------------------------------------------------------------|--------------|
| <p>ToxB (2MM0)<br/>S_00048503</p>   |    |    | <p>5.003</p> |
| <p>AvrPib (5Z1V)<br/>S_00012083</p> |   |   | <p>0.732</p> |
| <p>AvrPik (6FUB)<br/>S_00026064</p> |  |  | <p>1.765</p> |

|                                           |                                                                                     |                                                                                      |              |
|-------------------------------------------|-------------------------------------------------------------------------------------|--------------------------------------------------------------------------------------|--------------|
| <p>Avr1CO39<br/>(5ZNG)<br/>S_00045958</p> |    |    | <p>8.546</p> |
| <p>AvrPia (2N37)<br/>S_00047076</p>       |   |   | <p>3.380</p> |
| <p>AvrPiz-t<br/>(2LW6)<br/>S_00013493</p> |  |  | <p>4.113</p> |

**Figure S2.** Structures corresponding to the centroids of the top 10 largest clusters obtained using MaxCluster analysis for each structurally-unconfirmed effectors. The final model (a) for each one of these structurally-unconfirmed effectors is followed by other members (b)-(j). All models are shown with a rainbow colour scheme, from dark blue at the N-terminus to dark red at the C-terminus.

Avr2 (*F. fulva*)

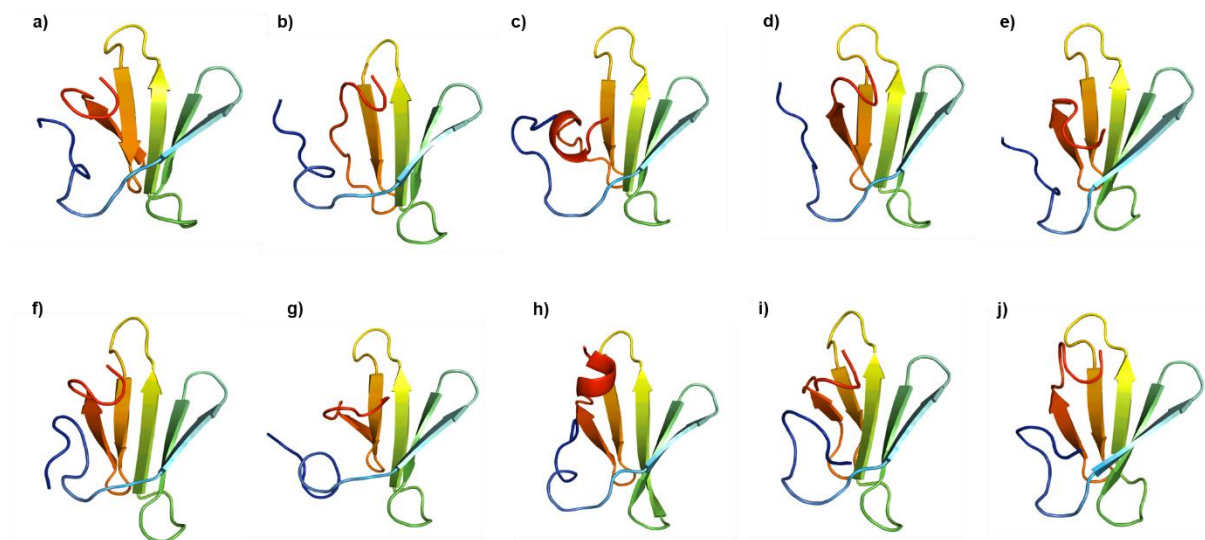

AvrStb6

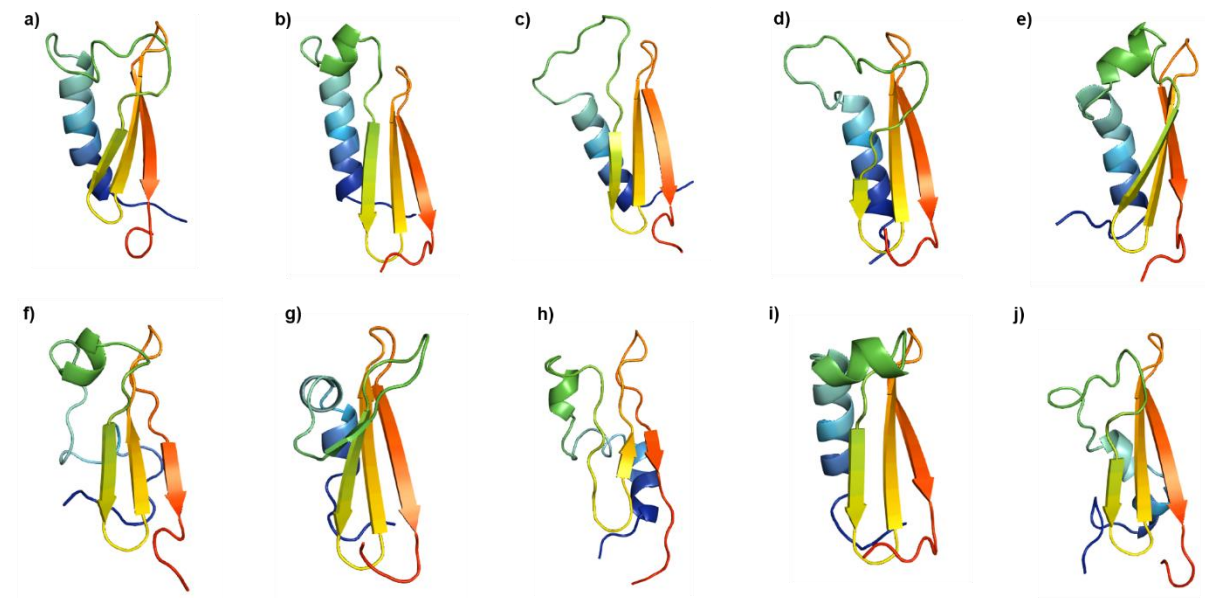

## BAS2

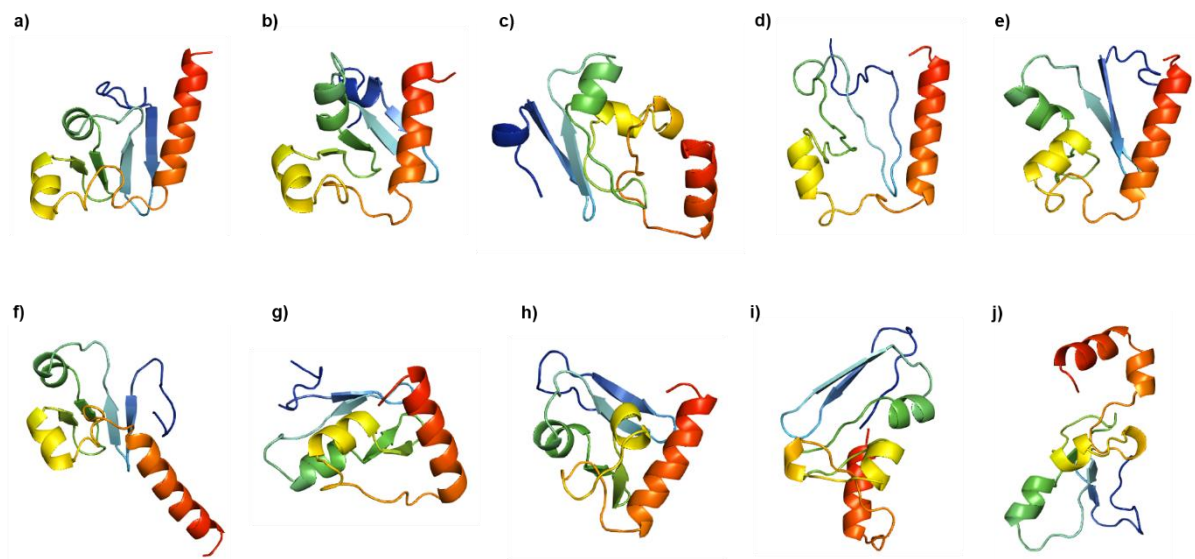

## MiSSP7

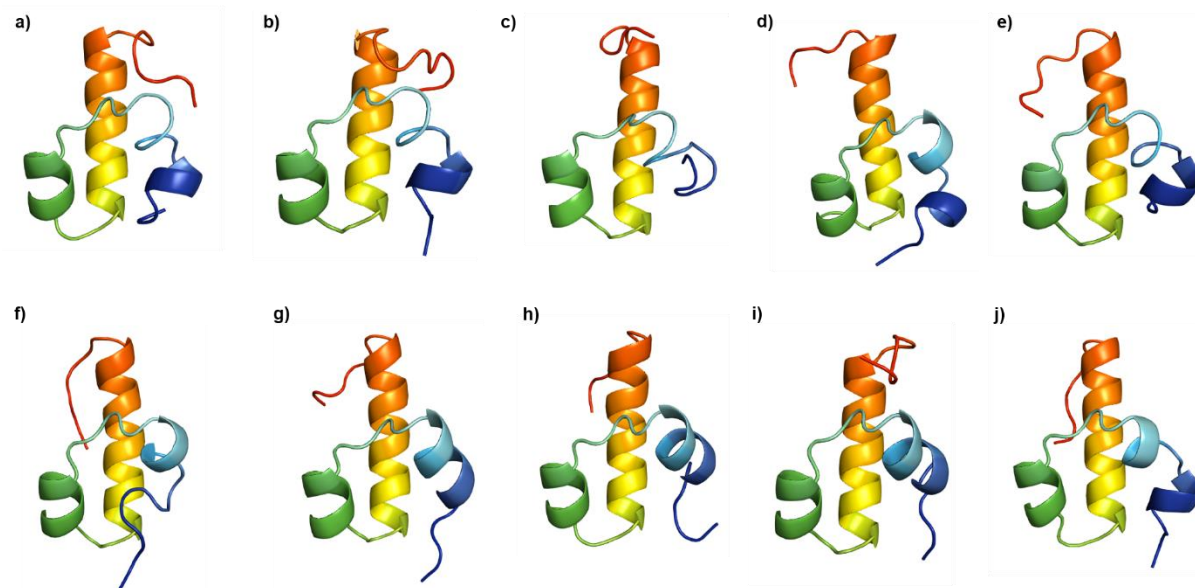



## BAS4

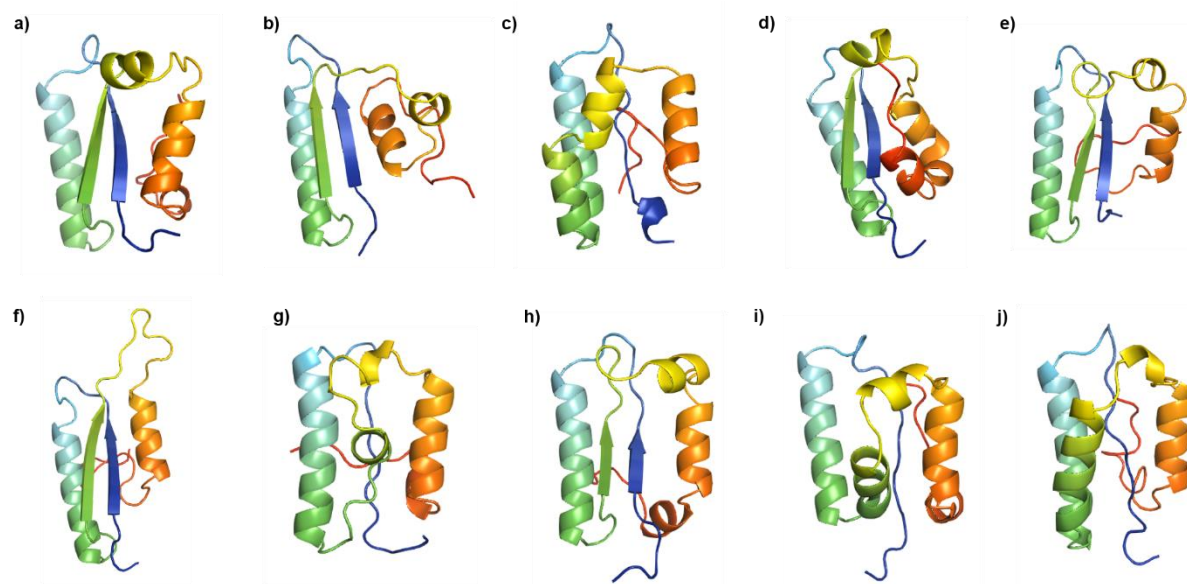

## PstSCR1

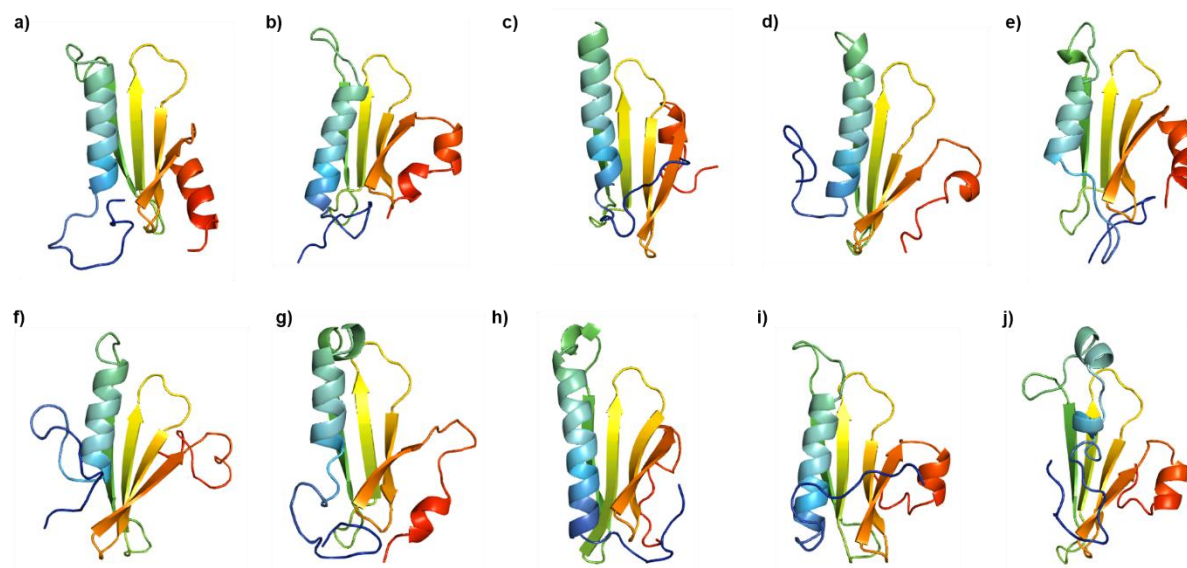

## ECP1

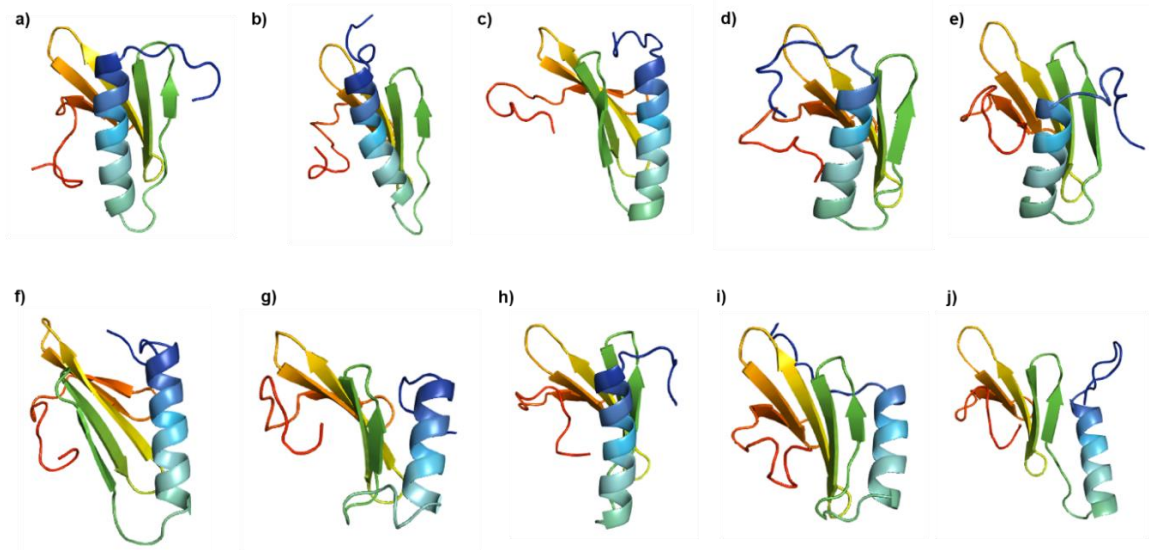

## AVRA1

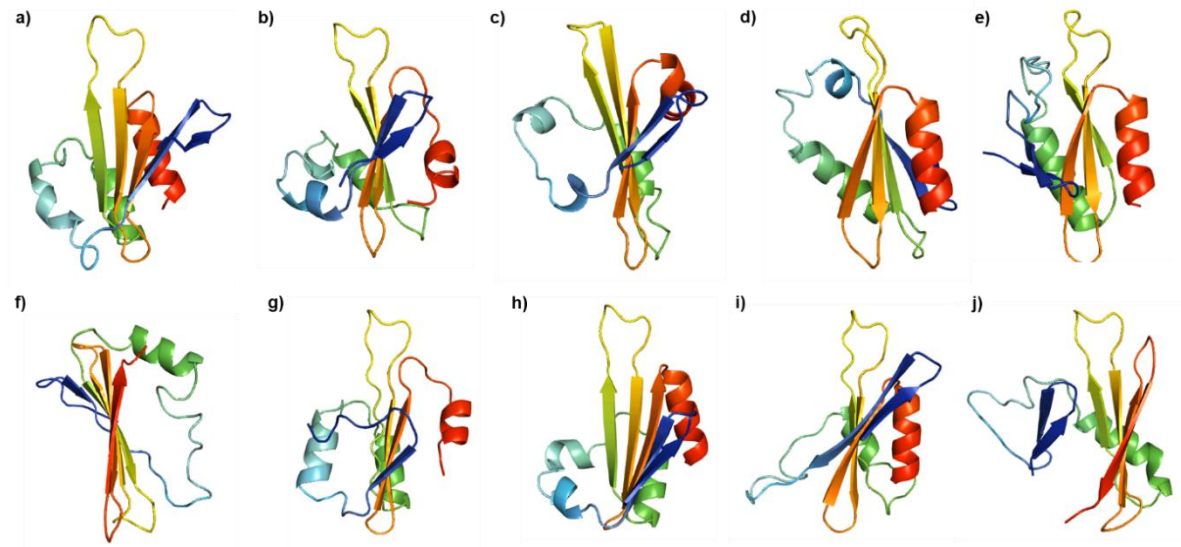



## Iug6

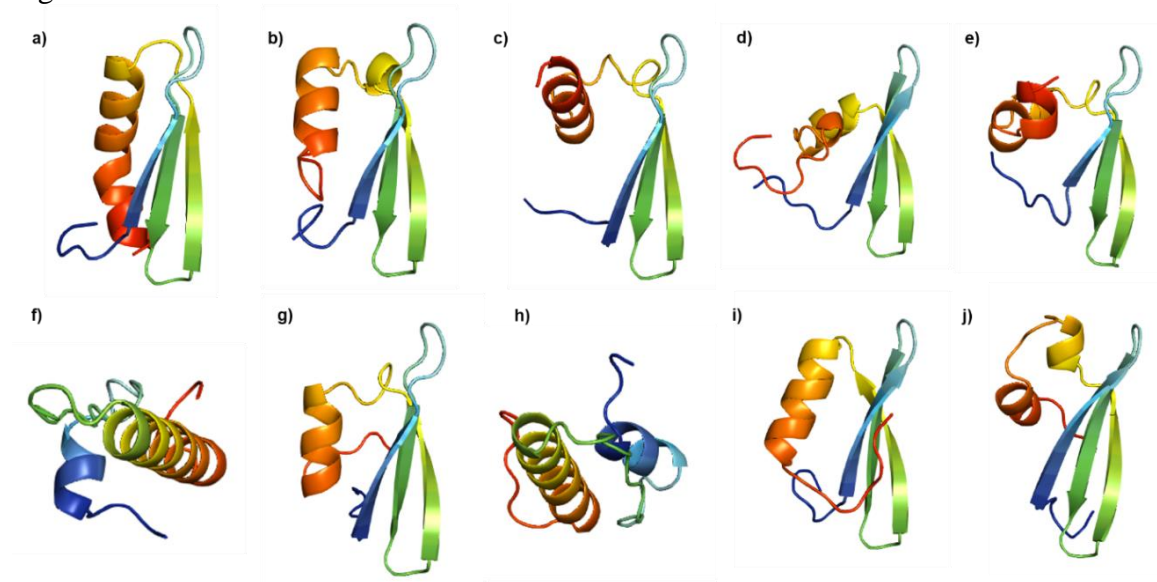

## PstPEC6

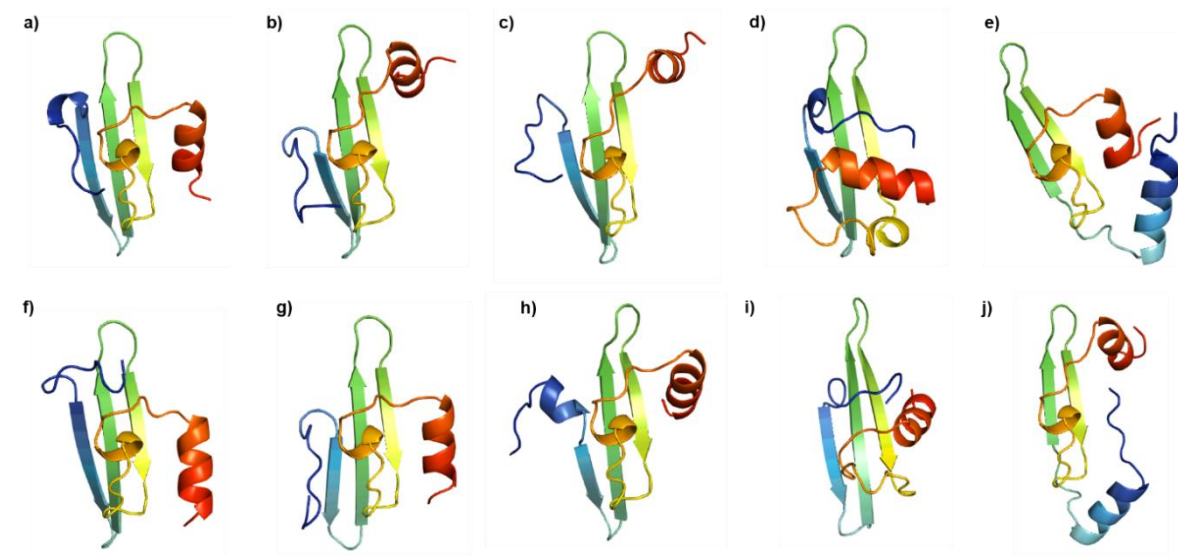

**Figure S3.** Comparison of *ab initio* models of structurally-unconfirmed effectors obtained with Rosetta (left) and AlphaFold v2.1.0 Colab (right). Protein modelling using AlphaFold was performed with no template in multiple sequence alignment mode and a single model was predicted for each effector candidate. All models are shown with a rainbow colour scheme, from dark blue at the N-terminus to dark red at the C-terminus.

a) Avr2 (*F. fulva*)

Rosetta  
models

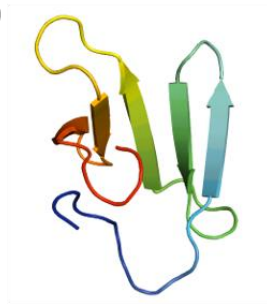

AlphaFold  
models

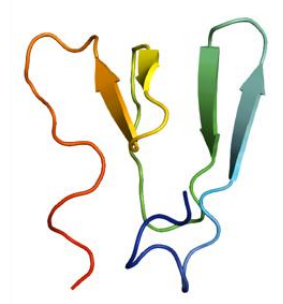

b) AvrStb6

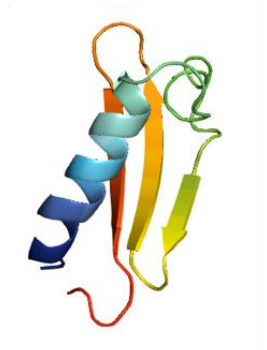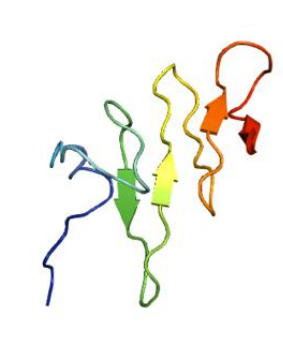

c) BAS2

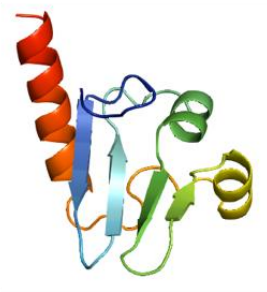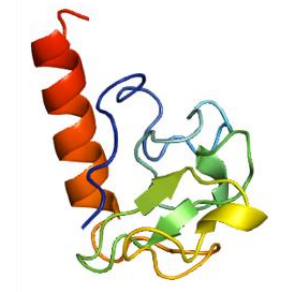

d) MiSSP7

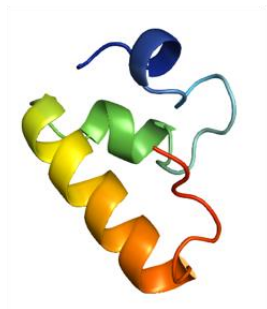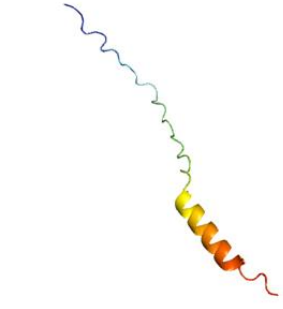

e) BAS4

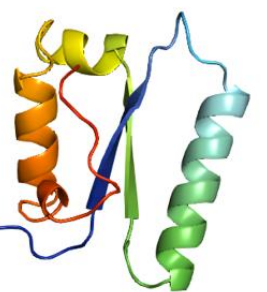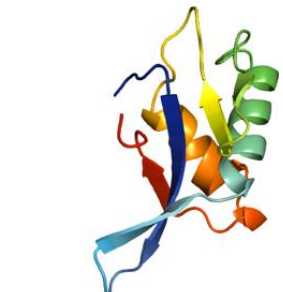

**f) PstSCR1**

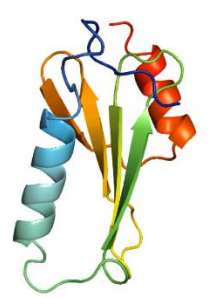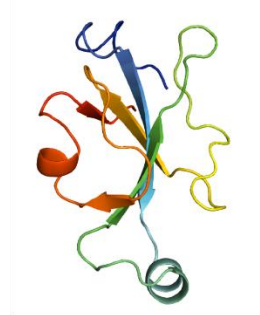

**g) ECP1**

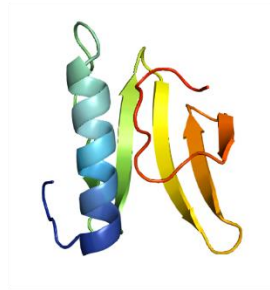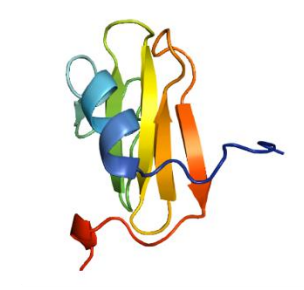

**h) AVRA1**

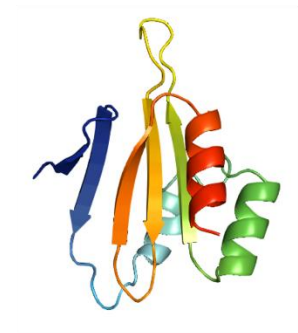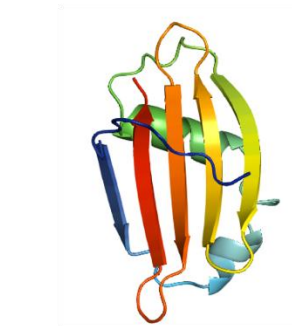

**i) Iug6**

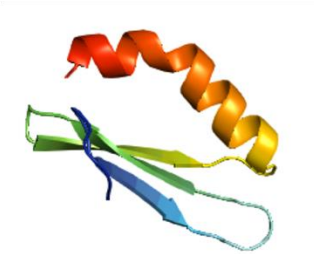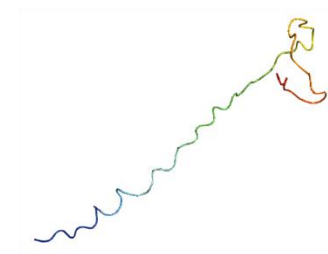

**j) PstPEC6**

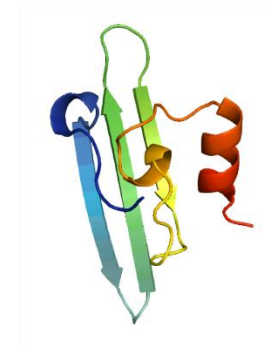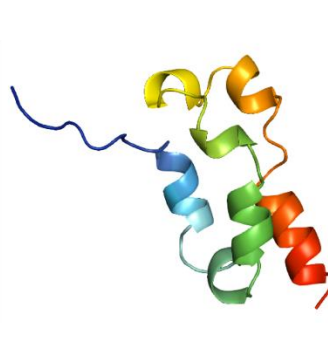

Supplement: s1 [file s1]
